# Supplementary material for: Color Image Segmentation Based on Different Color Space Models Using Automatic GrabCut
Source: Hindawi journal article supplement (doi:10.1155/2014/126025), 2014-01-01
Supplement: f1 [file 126025.f1.pdf]

**Table 1.** Experimental segmentation results of automatic GrabCut initialized using different clustering techniques.

| Image          | Error rate %       |       |       | Overlap Score rate % |       |       |
|----------------|--------------------|-------|-------|----------------------|-------|-------|
|                | Orchard and Bouman | SOFM  | FCM   | Orchard and Bouman   | SOFM  | FCM   |
| 1              | 18.70              | 3.15  | 24.92 | 58.57                | 95.68 | 43.97 |
| 2              | 5.74               | 2.80  | 2.80  | 75.69                | 93.70 | 93.70 |
| 3              | 7.31               | 6.00  | 4.95  | 85.48                | 89.12 | 91.21 |
| 4              | 3.09               | 3.67  | 61.00 | 97.02                | 95.63 | 38.40 |
| 5              | 3.75               | 36.48 | 36.54 | 85.18                | 29.16 | 29.13 |
| 6              | 0.86               | 0.86  | 0.86  | 97.17                | 97.16 | 97.16 |
| 7              | 2.40               | 2.40  | 2.40  | 69.01                | 68.93 | 69.00 |
| 8              | 1.08               | 2.18  | 1.92  | 90.81                | 80.83 | 82.98 |
| 9              | 2.17               | 12.87 | 2.15  | 97.31                | 81.31 | 97.35 |
| 10             | 2.81               | 4.15  | 4.15  | 96.35                | 94.33 | 94.26 |
| 11             | 2.05               | 2.17  | 2.17  | 97.04                | 96.71 | 96.71 |
| 12             | 4.93               | 4.93  | 4.92  | 89.32                | 89.32 | 89.35 |
| 13             | 2.30               | 2.30  | 2.33  | 95.64                | 95.64 | 95.53 |
| 14             | 2.56               | 3.96  | 2.49  | 96.41                | 93.27 | 96.59 |
| 15             | 3.50               | 2.89  | 2.89  | 91.98                | 94.03 | 94.05 |
| 16             | 3.02               | 2.98  | 2.98  | 93.80                | 94.26 | 94.26 |
| 17             | 2.10               | 2.16  | 2.16  | 95.11                | 94.75 | 94.75 |
| 18             | 3.86               | 3.88  | 3.88  | 91.06                | 90.98 | 90.98 |
| 19             | 2.92               | 2.88  | 37.10 | 93.30                | 93.43 | 38.35 |
| 20             | 1.44               | 1.46  | 1.47  | 96.43                | 96.34 | 96.33 |
| 21             | 1.27               | 1.27  | 1.28  | 94.64                | 94.64 | 94.61 |
| 22             | 3.16               | 3.44  | 3.17  | 93.73                | 93.07 | 93.71 |
| 23             | 2.58               | 3.27  | 2.56  | 93.74                | 91.15 | 93.78 |
| <b>Average</b> | 3.64               | 4.88  | 9.18  | 90.21                | 88.85 | 82.80 |
| <b>SD</b>      | 3.61               | 7.28  | 15.49 | 9.87                 | 14.54 | 22.24 |
